# Supplementary material
Source: PubMed Central journal article supplement (PMC5029218)
Supplement: ismej2015179x1.pdf [file ismej2015179x1.pdf]

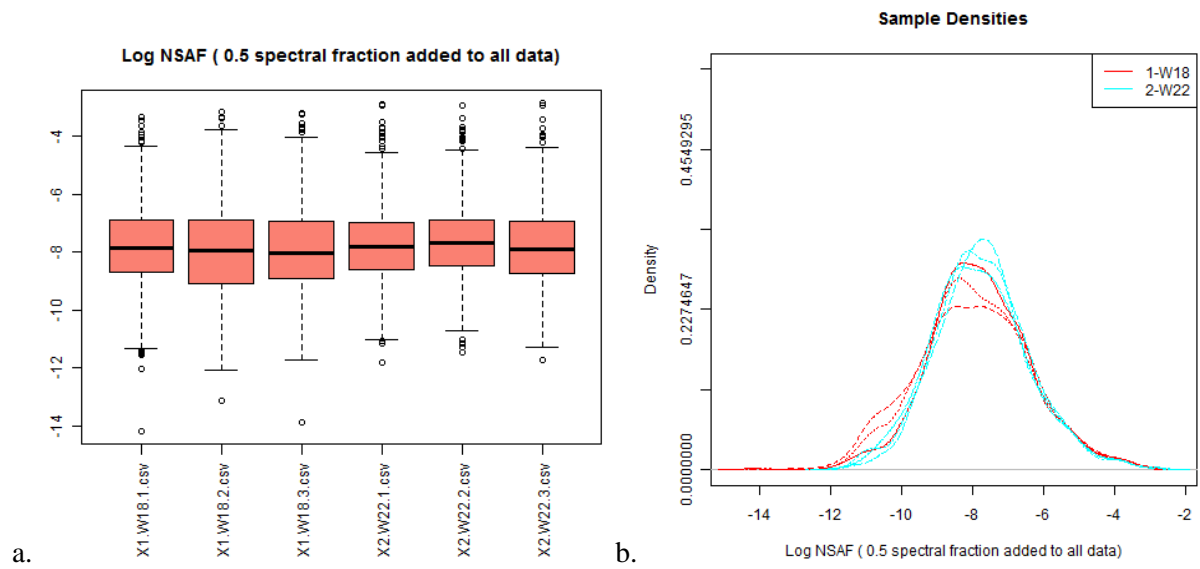

Supplementary figure S1: Distribution of log transformed NSAF values of strain WH8102 at 18°C and 22°C. a. boxplot depicting population means of replicates within and between 18°C and 22°C; b. kernel density plots depicting the normal distribution of replicate datasets.
